# Supplementary material for: Mediational Effects of Self-Efficacy Dimensions in the Relationship between Knowledge of Dengue and Dengue Preventive Behaviour with Respect to Control of Dengue Outbreaks: A Structural Equation Model of a Cross-Sectional Survey
Source: PLOS journal article supplement (doi:10.1371/journal.pntd.0002401), 2013-09-26
Supplement: S2 (10.1371/journal.pntd.0002401.s002) [file journal.pntd.0002401.s002]

Table S1: Scores for Involvement in Health Promotion Activities

| <b>Days of Involvement</b> | <b>Mark</b> |
|----------------------------|-------------|
| 0 to 1                     | 0           |
| 1 to 2                     | 1           |
| 3 to 5                     | 2           |
| 6 to 10                    | 3           |
| $\geq 11$                  | 4           |

Table S2. Health Promotion Exposures Calculation Based on Kriska's MAQ (1997)

| <b>Calculation</b> | <b>Domain</b>                                                                             | <b>Maximum Marks</b> |
|--------------------|-------------------------------------------------------------------------------------------|----------------------|
| A                  | <i>Number of activities involved</i><br>Questionnaires No 11 X (No 12a to No 12e) X No 13 | 60                   |
| B                  | <i>Number of information received</i><br>Questionnaires No 14 X (No 15a to No 15f)        | 20                   |
| C                  | <i>Score of recent behaviour compliance</i><br>Questionnaires No 16 X No 17               | 20                   |
| <b>TOTAL</b>       |                                                                                           | <b>100</b>           |

Table S3. Indication of Knowledge Level Based on Bloom's Taxonomy

| <b>Score %</b> | <b>Knowledge Level</b>  |
|----------------|-------------------------|
| 80 – 100       | Excellent (Application) |
| 50 – 79.9      | Good (Comprehension)    |
| 0 – 49.9       | Poor (Knowledge Level)  |

Table S4. Level and Strength of Self-Efficacy Categorization

| <b>Mean Scales</b> | <b>Level &amp; Strength of Self-Efficacy</b> |
|--------------------|----------------------------------------------|
| 9 - 10             | Excellent                                    |
| 7 – 8.99           | Good                                         |
| 5 – 6.99           | Moderate                                     |
| 3 – 4.99           | Low                                          |
| 0 – 2.99           | Very Low / Poor                              |
